# Supplementary material
Source: Springer Nature journal article supplement (https://www.springermedizin.de/resource/supplementary/12906_2012_1107_MOESM4_ESM.pdf/9520344)

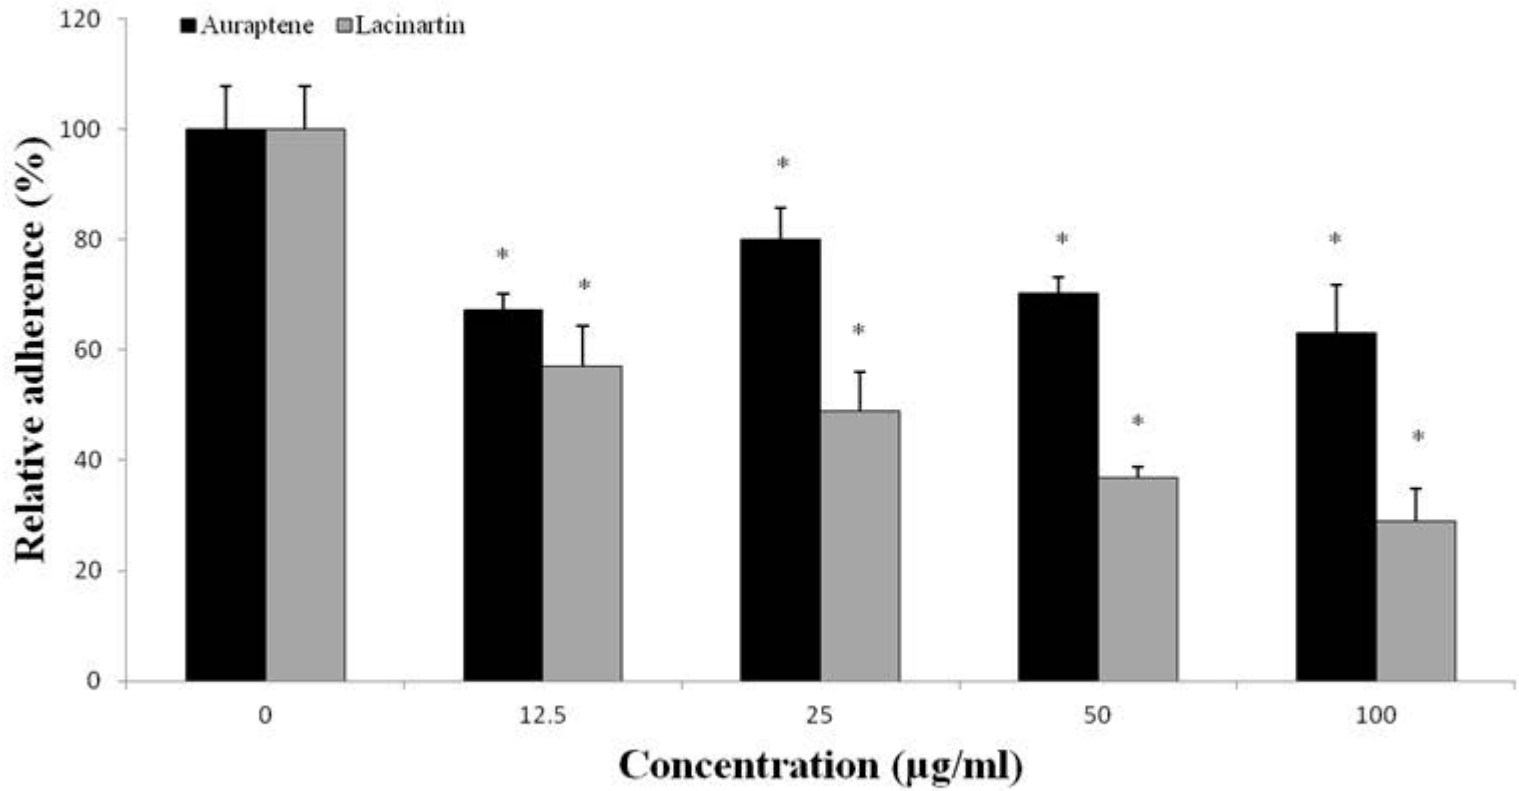

Supplement: MOESM4 [file 9520344]
